# Supplementary material for: Anti-wetting behaviour of a superhydrophobic octadecyltrimethoxysilane blended PVDF/recycled carbon black composite membrane for enhanced desalination
Source: Royal Society of Chemistry journal article supplement (doi:10.1039/c8ew00451j), 2018-01-01
Supplement: c8ew00451j1.pdf [file c8ew00451j1.pdf]

## Supporting Information

**SI Table 1. Conditions used for fabricating the PVDF membrane by utilizing a knife-casting device (phase inversion technique) [Note: Concentration % indicates: % w/v]**

| Polymer concentration | Casting Temperature | Relative air Humidity | Casting vacuum plate speed | Casting knife gap |
|-----------------------|---------------------|-----------------------|----------------------------|-------------------|
| 18% PVDF              | 24± 2°C             | 31±5 %                | 10 mm/sec                  | 50 µm             |
| 18% PVDF+ 2% CB       | 24± 2°C             | 31±5 %                | 10 mm/sec                  | 50 µm             |

**SI Table 2. Effect of viscosity after CB incorporation in 18% w/v PVDF polymeric solution**

| Solution Type            | Viscosity (cP) |
|--------------------------|----------------|
| 18 % w/v PVDF            | 48.7 cP        |
| 18% w/v PVDF + 2% w/v CB | 51.5 cP        |

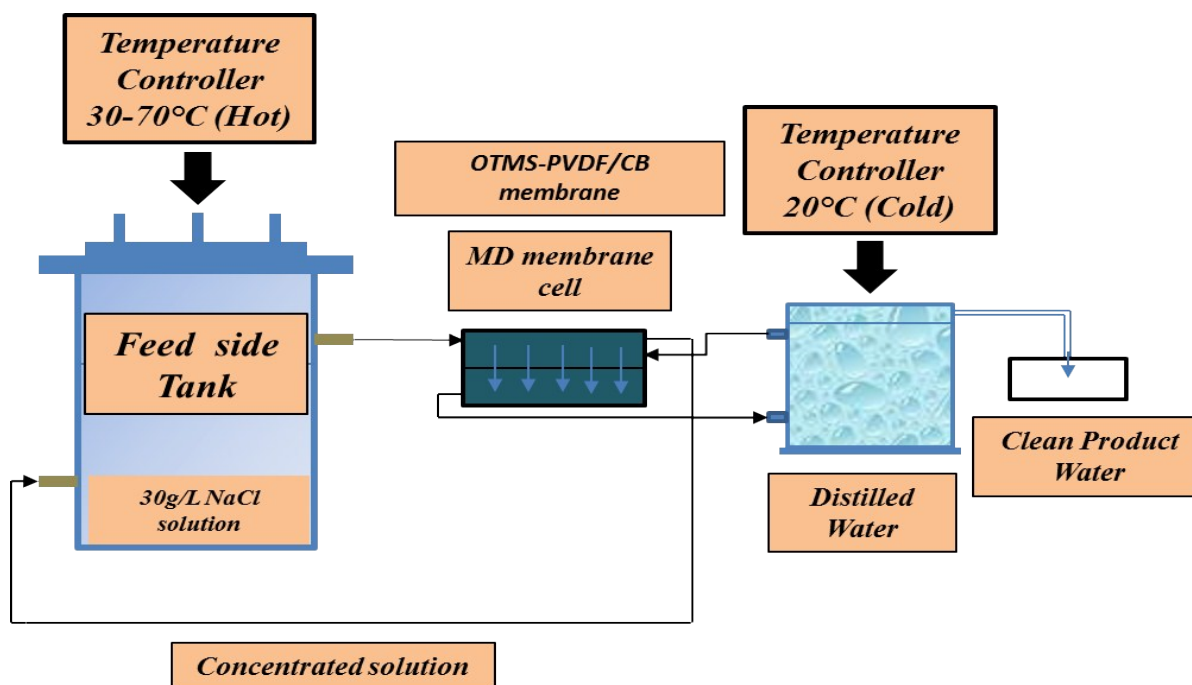

**SI Figure 1. Schematic of lab-scale DCMD process.**

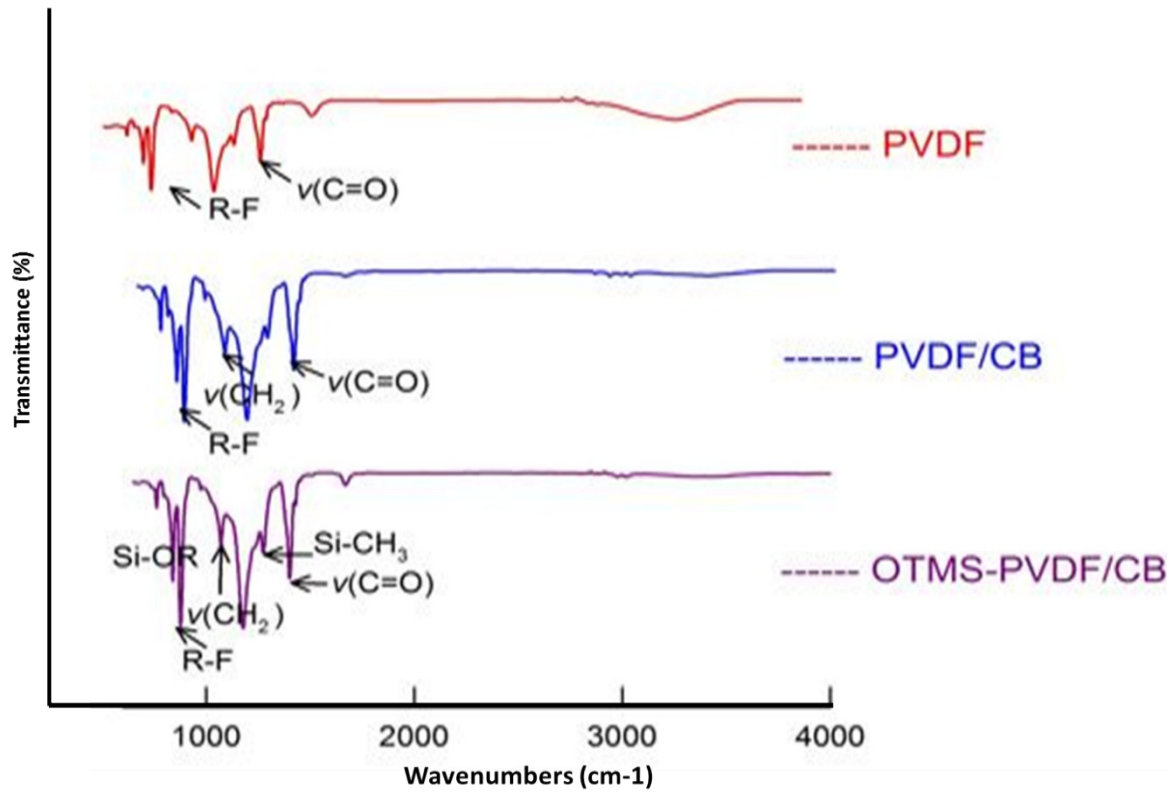

SI Figure 2. FTIR spectroscopy analysis of the PVDF, PVDF/CB, and surface-modified OTMS-PVDF/CB membranes. [Note: FTIR spectra have been measured in the range of 600–4000 cm<sup>-1</sup>]

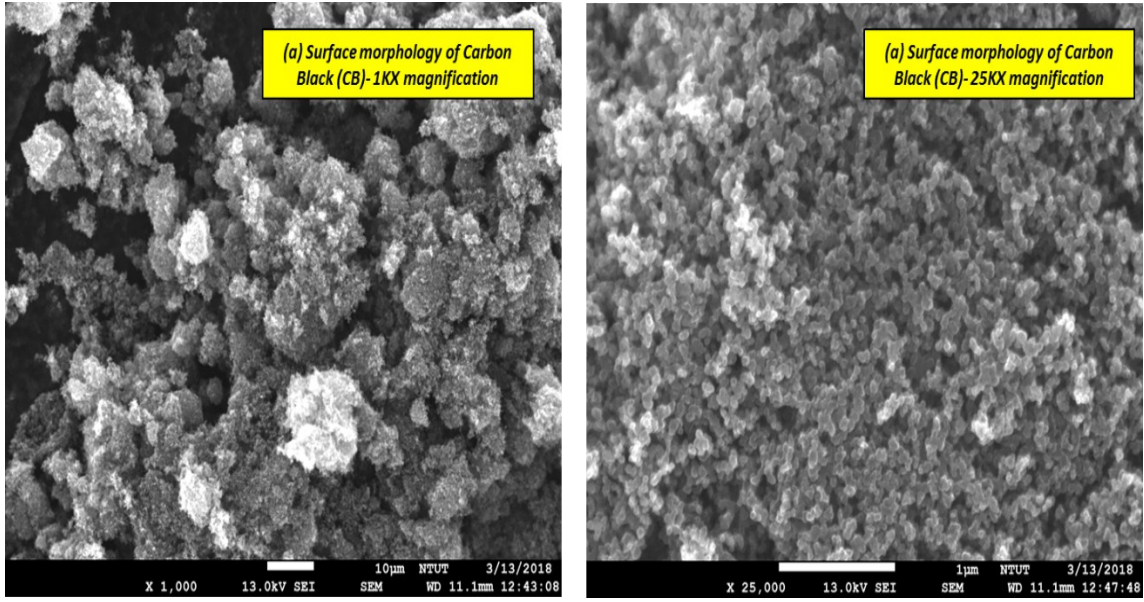

SI Figure 3. Surface topography and morphology of the granular CB. (a) Showing the CB granule of 1KX magnification (b) Showing their fine structure of 25 KX magnification

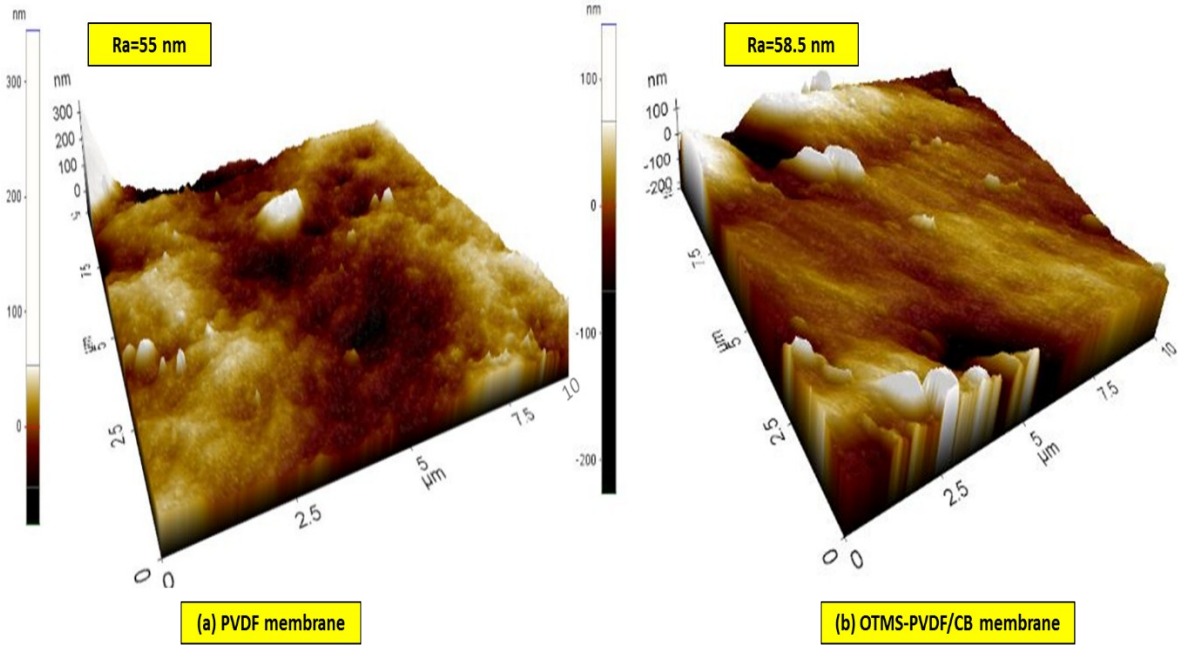

SI Figure 4: 3-D AFM pictures of different fabricated membrane surfaces (a) PVDF membrane and (b) OTMS-PVDF/CB membrane [Note: dimensions: 10 µm × 10 µm]
